# Supplementary material for: Olefin metathesis in confined spaces: the encapsulation of Hoveyda–Grubbs catalyst in peanut, square, and capsule shaped hollow silica gels
Source: Royal Society of Chemistry journal article supplement (doi:10.1039/d2cy01291j), 2022-01-01
Supplement: d2cy01291j1.pdf [file d2cy01291j1.pdf]

## Olefin Metathesis in Confined Spaces: The Encapsulation of Hoveyda-Grubbs Catalyst in Peanut, Square, and Capsule Shaped Hollow Silica Gels

Mina Aşkun<sup>a</sup>, Kutay Sagdic<sup>b,c</sup>, Fatih Inci<sup>b,c</sup>, Bengi Özgün Öztürk<sup>a,\*</sup>

<sup>a</sup>Hacettepe University, Faculty of Science, Chemistry Department, 06800, Beytepe-Ankara, TÜRKİYE

<sup>b</sup>UNAM—National Nanotechnology Research Center, Bilkent University, 06800 Ankara, TURKEY

<sup>c</sup>Institute of Materials Science and Nanotechnology, Bilkent University, 06800, Ankara, TURKEY

### SUPPORTING INFORMATION

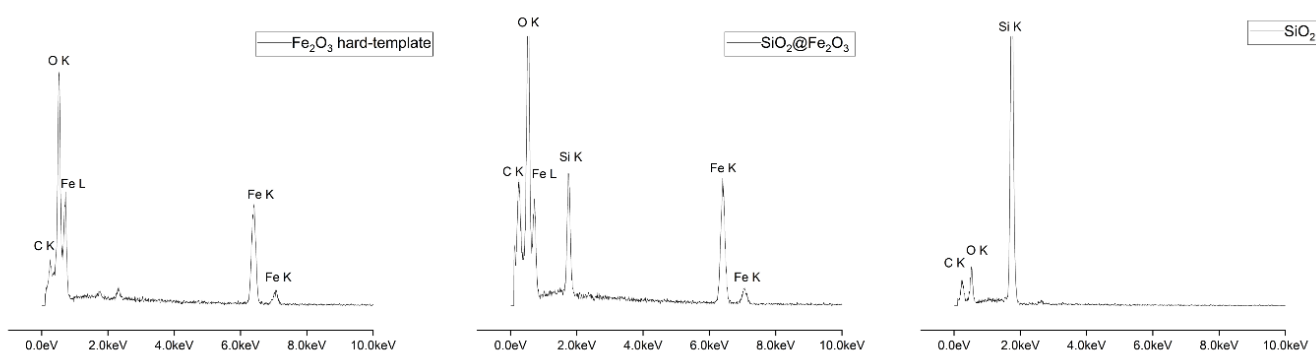

**Figure S 1.** EDX analysis of  $\text{Fe}_2\text{O}_3$ ,  $\text{SiO}_2@\text{Fe}_2\text{O}_3$ , and hollow silica gels.

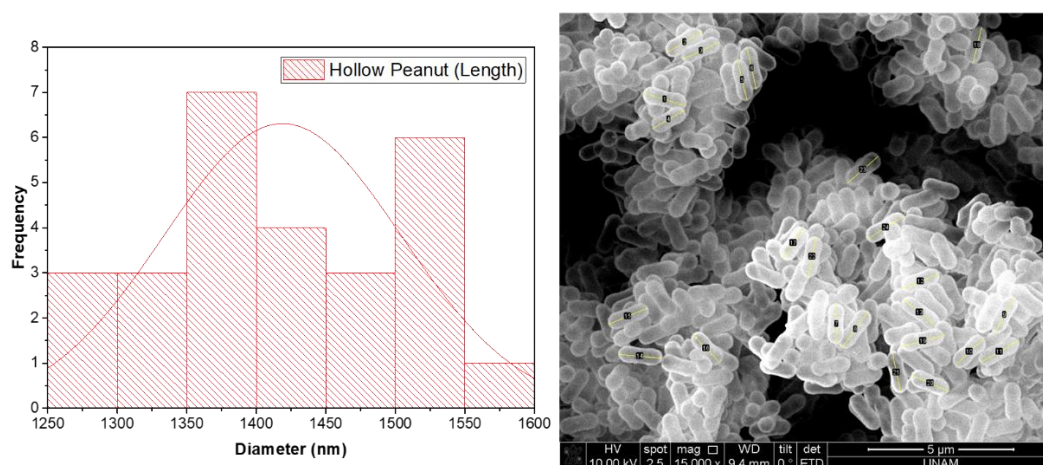

**Figure S2.** Particle size (length) distribution of hollow peanut shaped silica gels. Left figure size distribution curve, right figure corresponding SEM image (Average particle length is  $1375 \pm 110$  nm.)

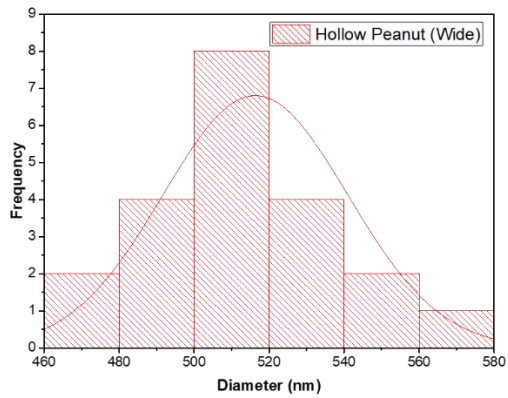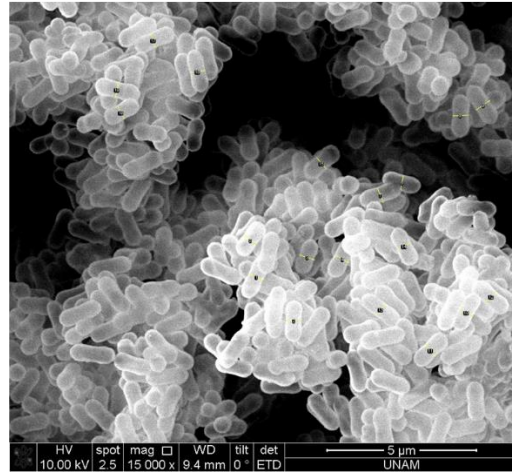

Figure S 3. Particle size (wide) distribution of hollow peanut shaped silica gels (Left figure size distribution curve, right figure corresponding SEM image (Average particle wide is  $510 \pm 80$  nm.)

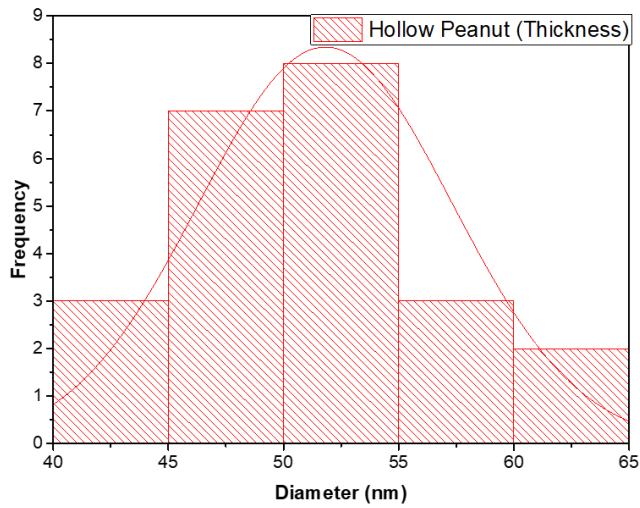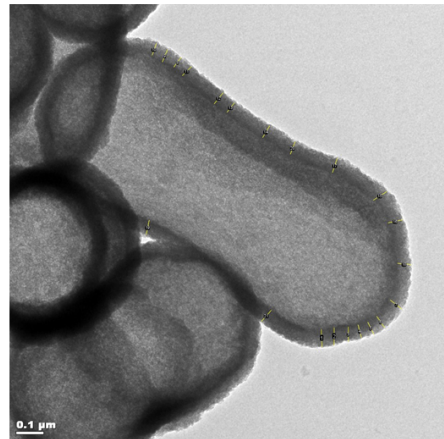

Figure S 4. Shell thickness of peanut silica gels (Left figure size distribution curve, right figure corresponding high contrast TEM image (Average shell thickness is  $53 \pm 6$  nm)

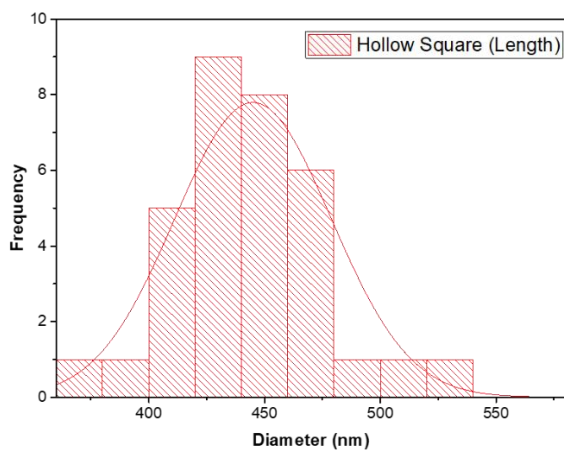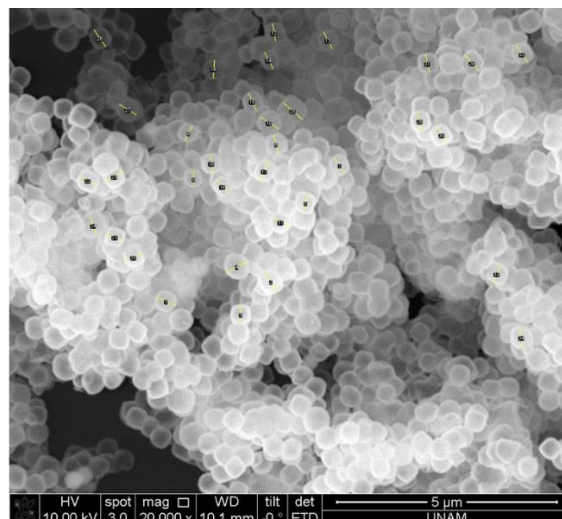

Figure S 5. Particle size (length) distribution of hollow peanut shaped silica gels (Left figure size distribution curve, right figure corresponding SEM image (Average particle length is  $430 \pm 65$  nm.))

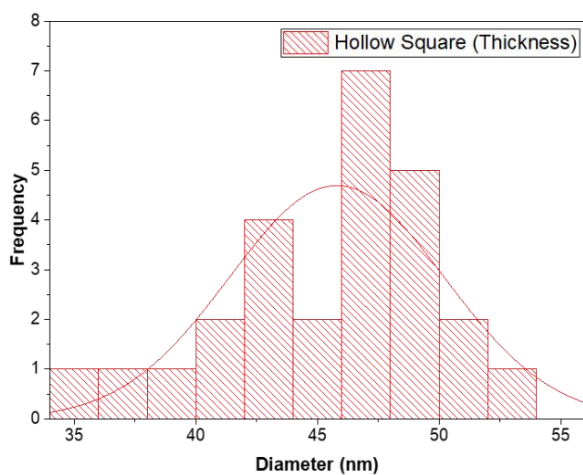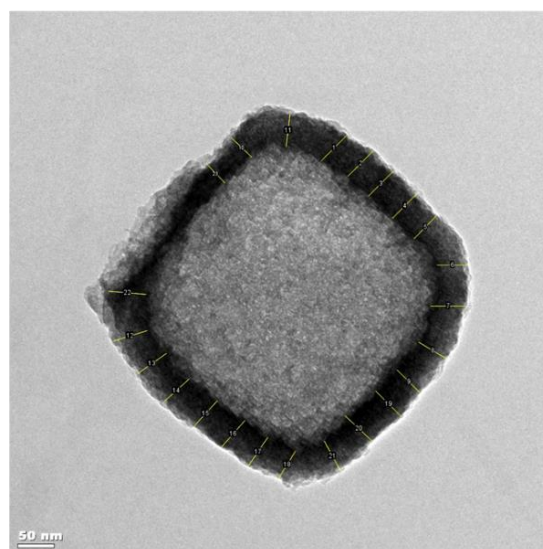

Figure S 6. Shell thickness of square silica gels (Left figure size distribution curve, right figure corresponding high contrast TEM image (Average shell thickness is  $47 \pm 8$  nm))

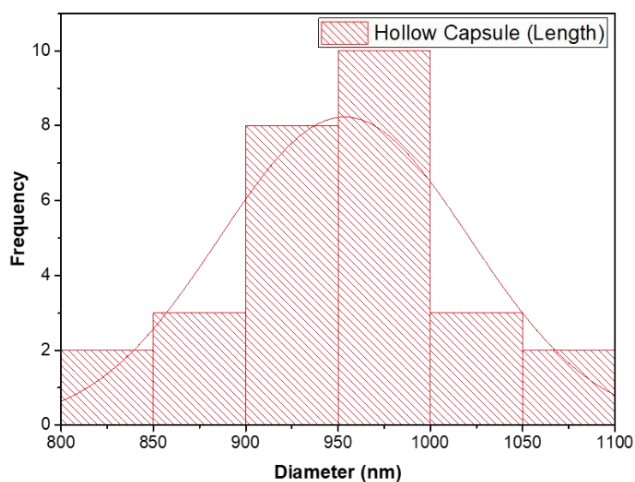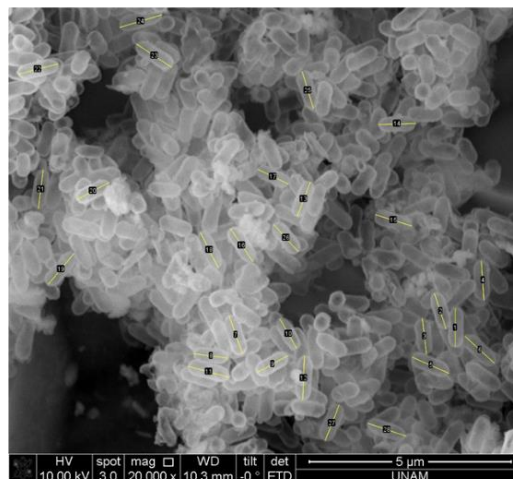

Figure S 7. Particle size (length) distribution of hollow capsule shaped silica gels (Left figure size distribution curve, right figure corresponding SEM image (Average particle length is  $975 \pm 145$  nm.)

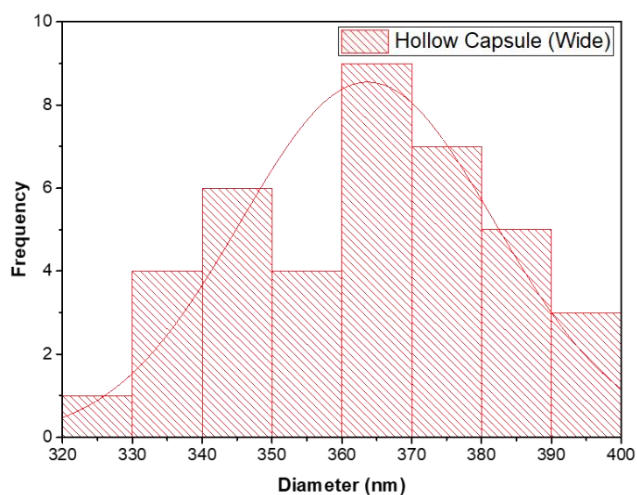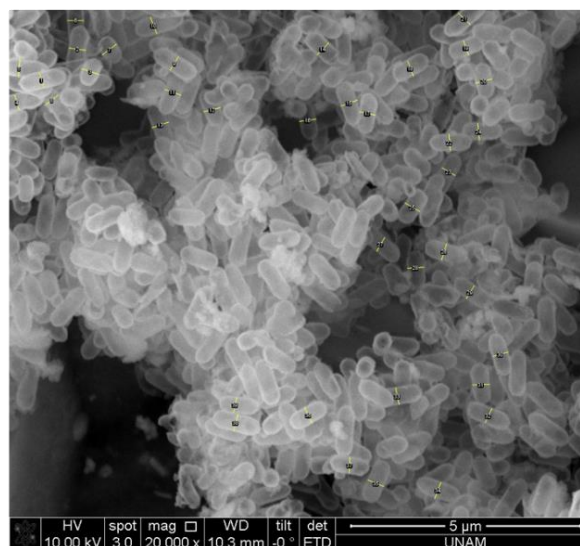

Figure S 8. Particle size (wide) distribution of hollow peanut shaped silica gels Left figure size distribution curve, right figure corresponding SEM image (Average particle length is  $1375 \pm 110$  nm.)

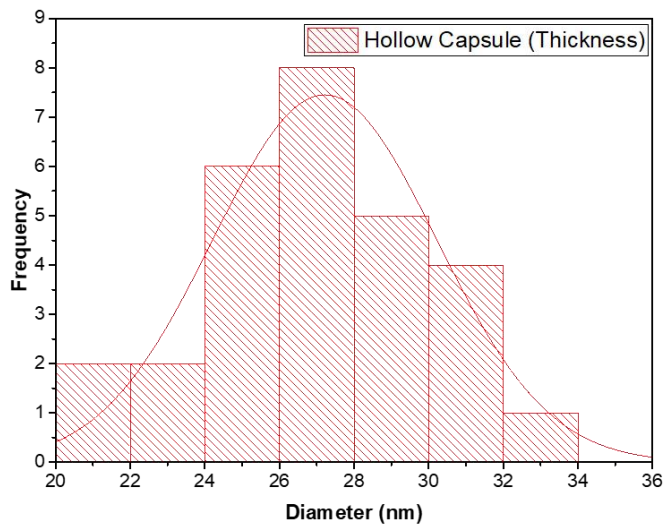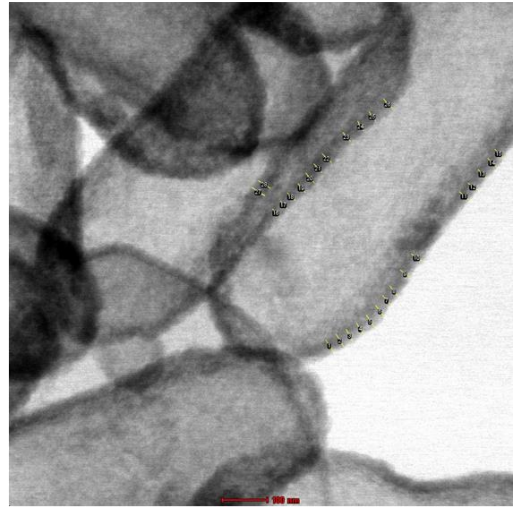

Figure S 9. Shell thickness of capsule silica gels (Left figure size distribution curve, right figure corresponding high contrast TEM image (Average shell thickness is  $27 \pm 9$  nm))

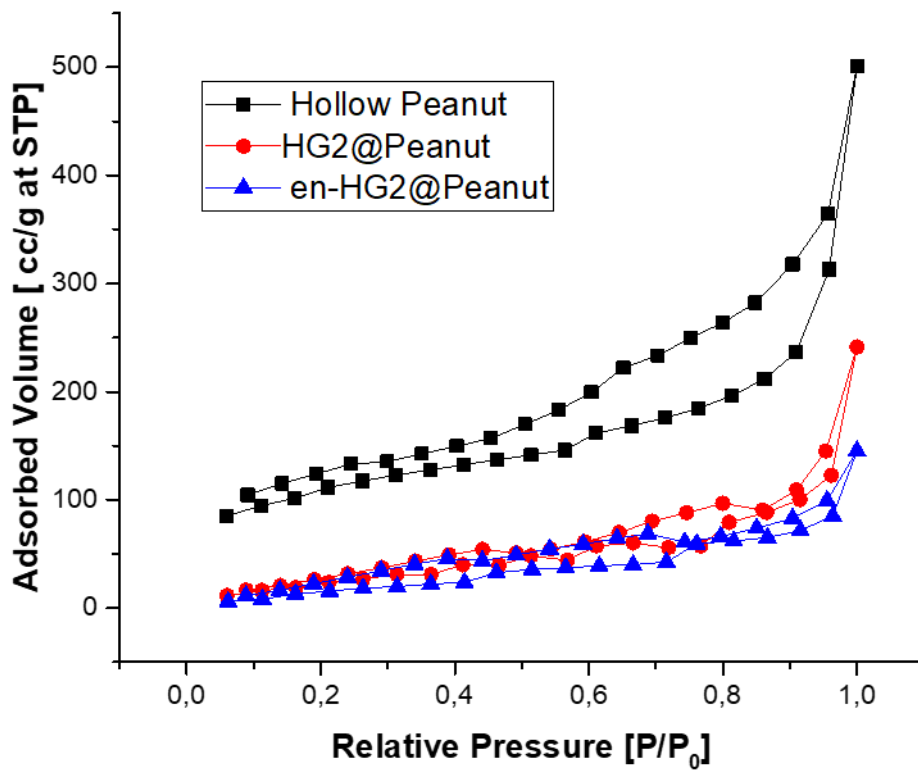

Figure S 10.  $N_2$  adsorption/desorption isotherms of peanut shaped hollow silica gels

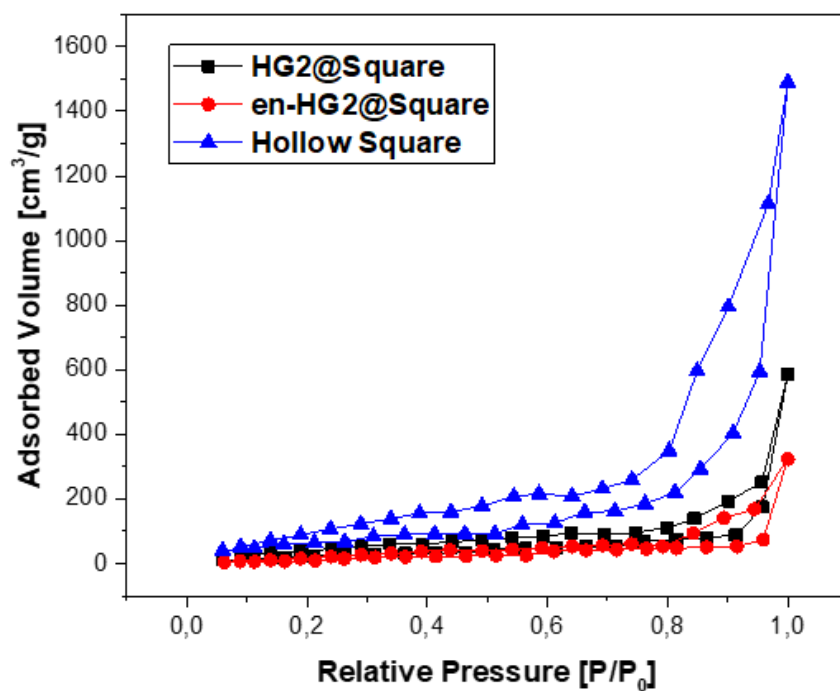

Figure S 11.  $N_2$  adsorption/desorption isotherms of square shaped hollow silica gels

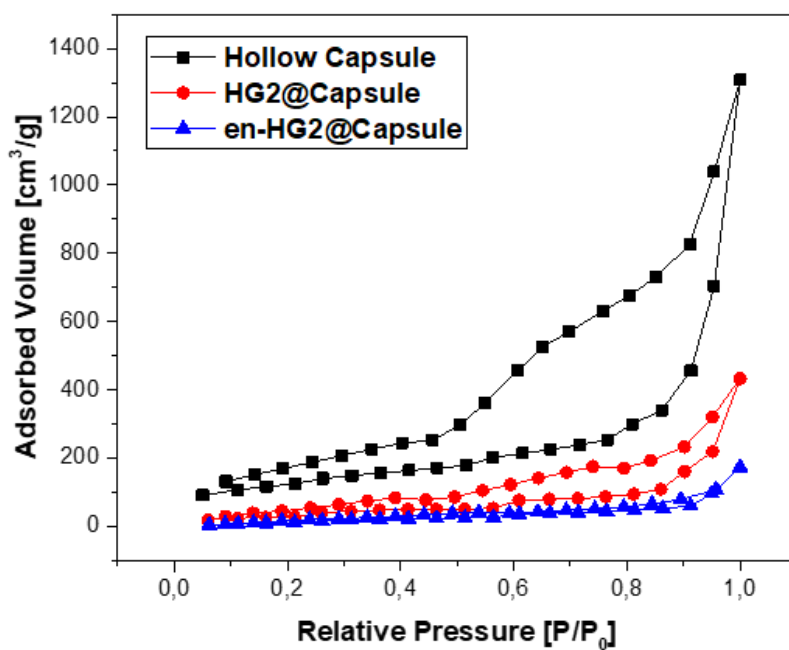

Figure S 12.  $N_2$  adsorption/desorption isotherms of capsule shaped hollow silica gels

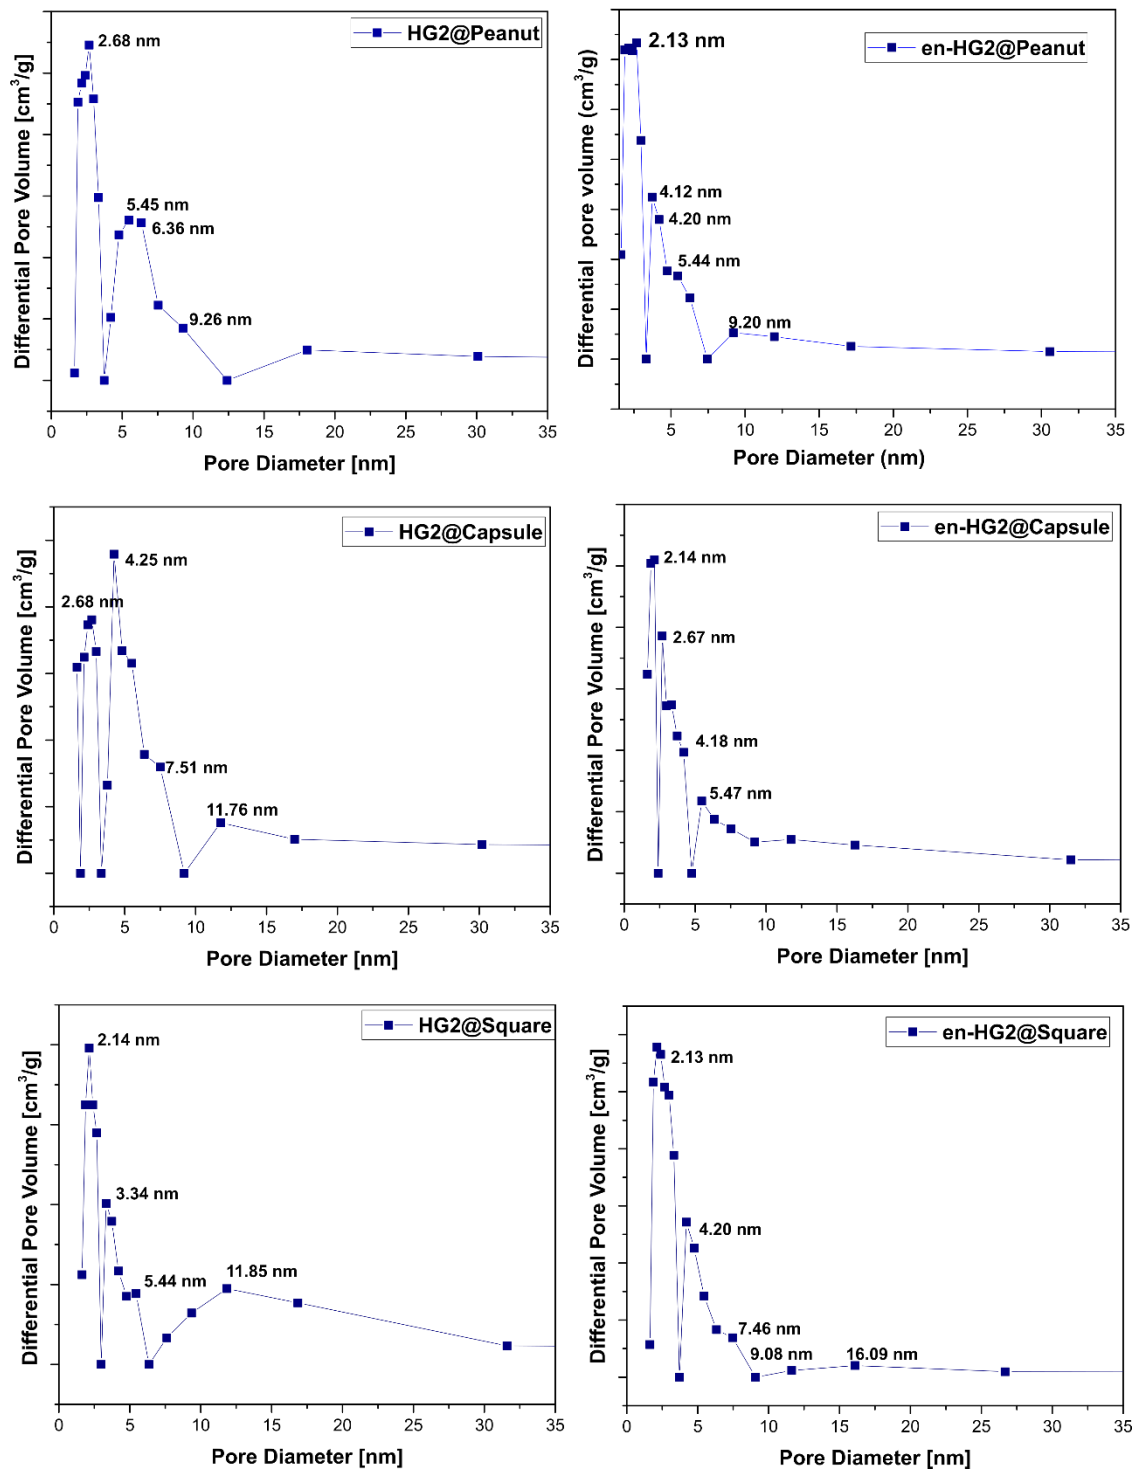

Figure S 13. Pore size distribution curves for HG2 encapsulated silica gels.

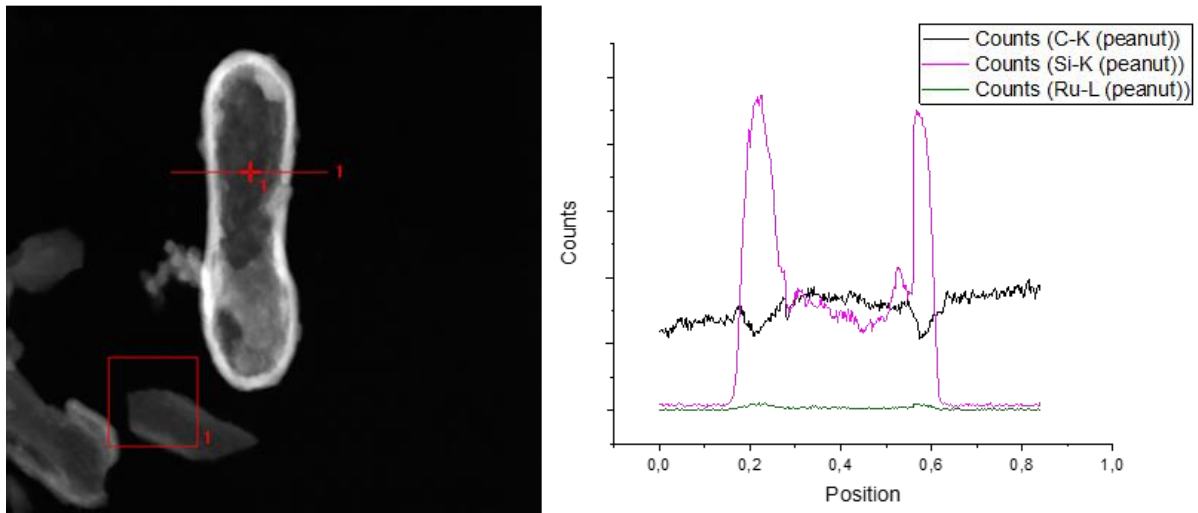

Figure S 14. High resolution TEM-elemental line analysis of en-HG2@Peanut

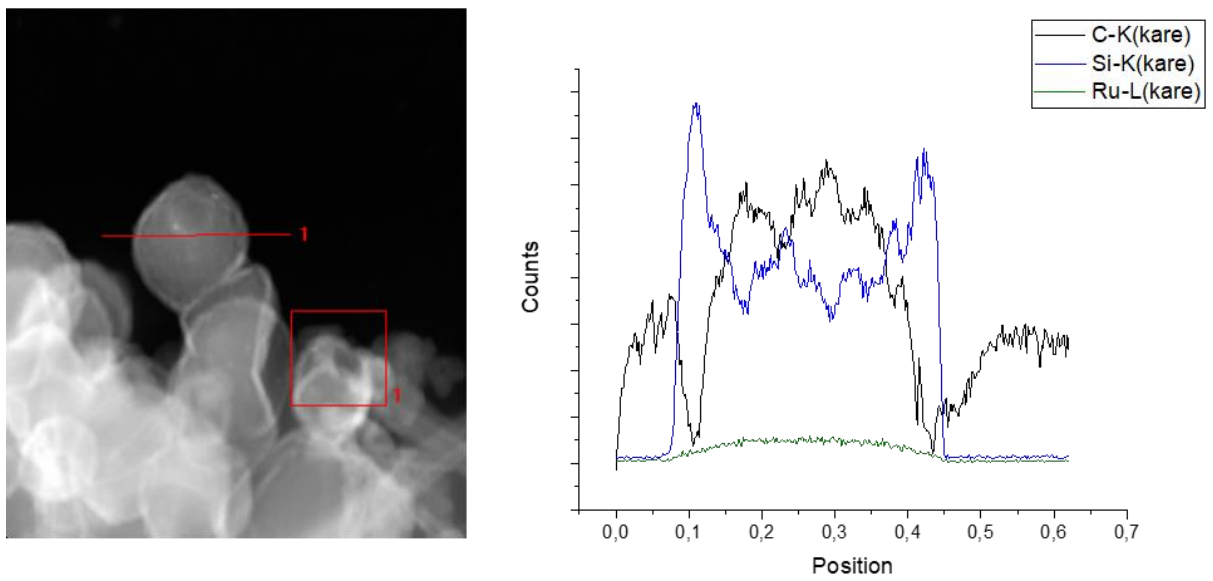

Figure S 15. High resolution TEM-elemental line analysis of en-HG2@Square



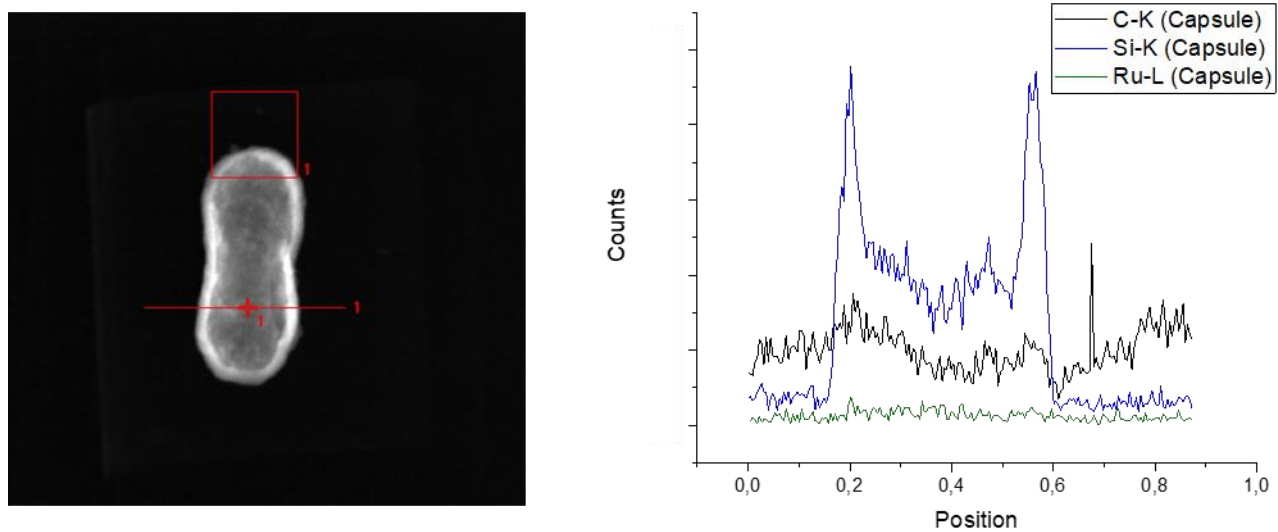

Figure S 16. High resolution TEM-elemental line analysis of en-HG2@Capsule

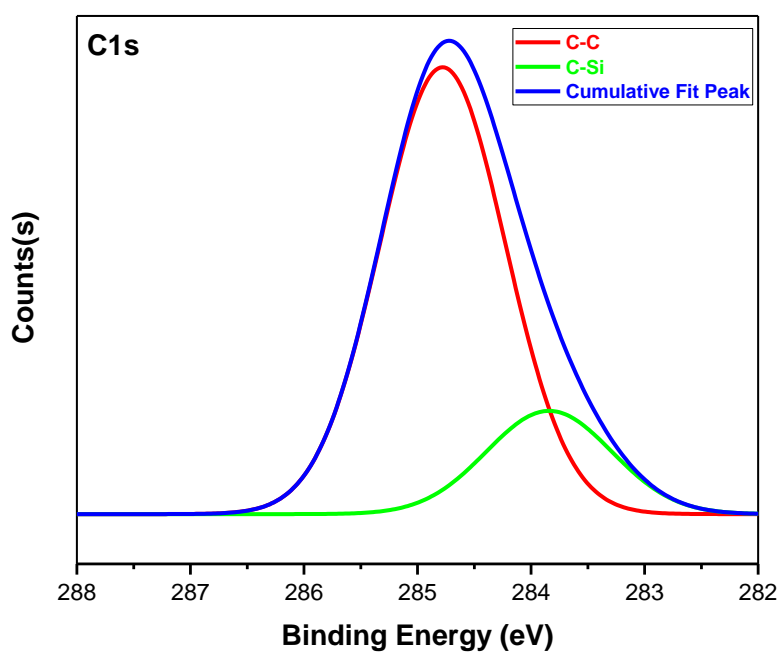

Figure S 17. C1s XPS spectrum of en-HG2@Peanut

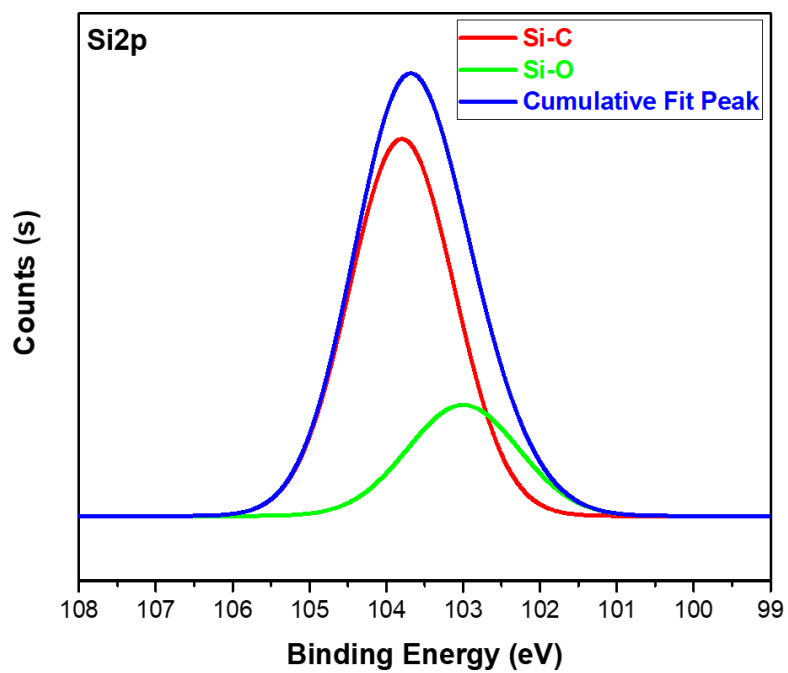

Figure S 18. Si2p XPS spectrum of en-HG2@Peanut

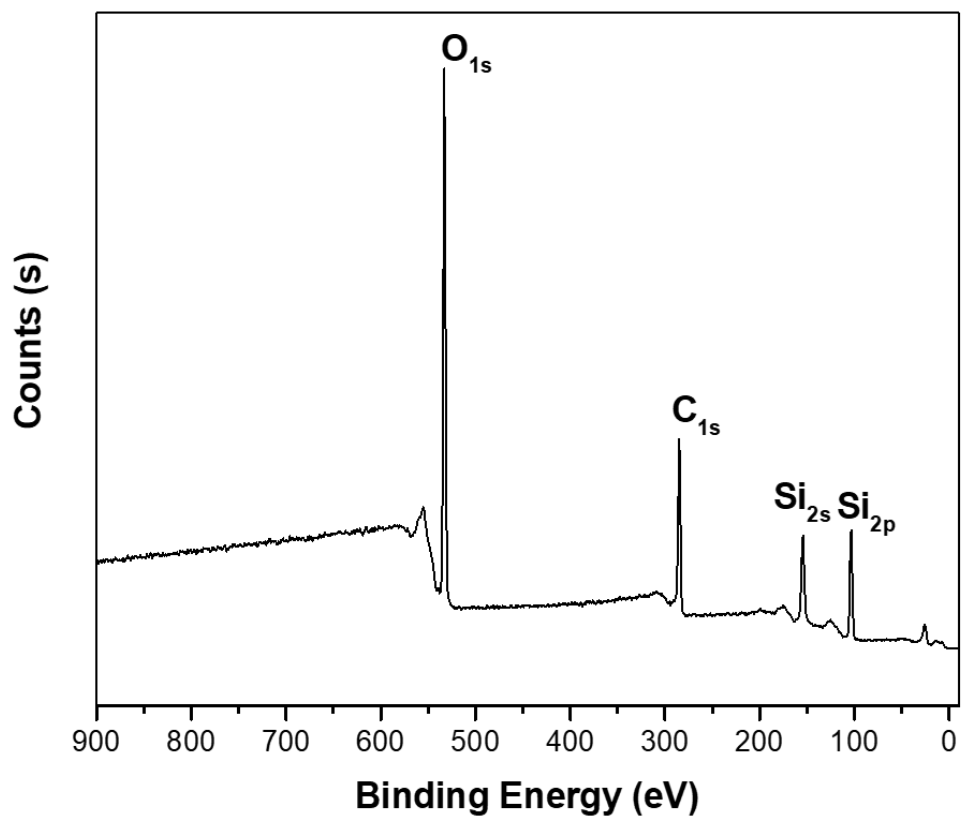

Figure S 19. XPS survey of en-HG2@Peanut

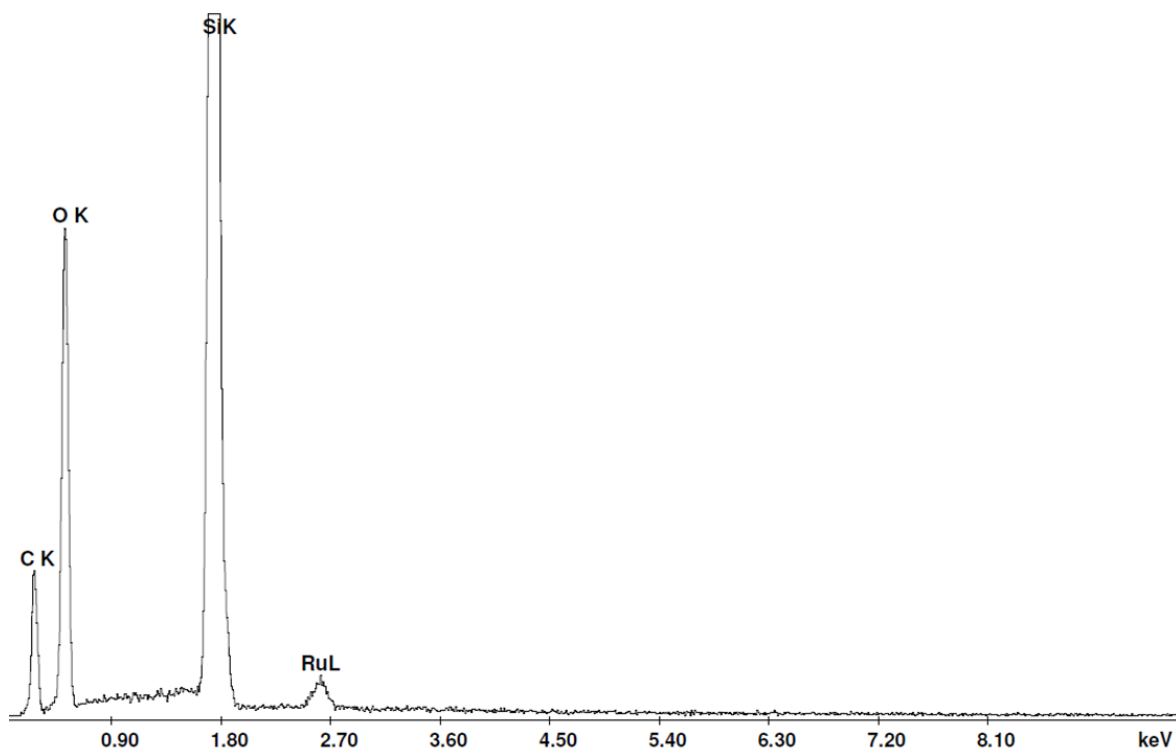

Figure S 20. EDX analysis of en-HG2@Square

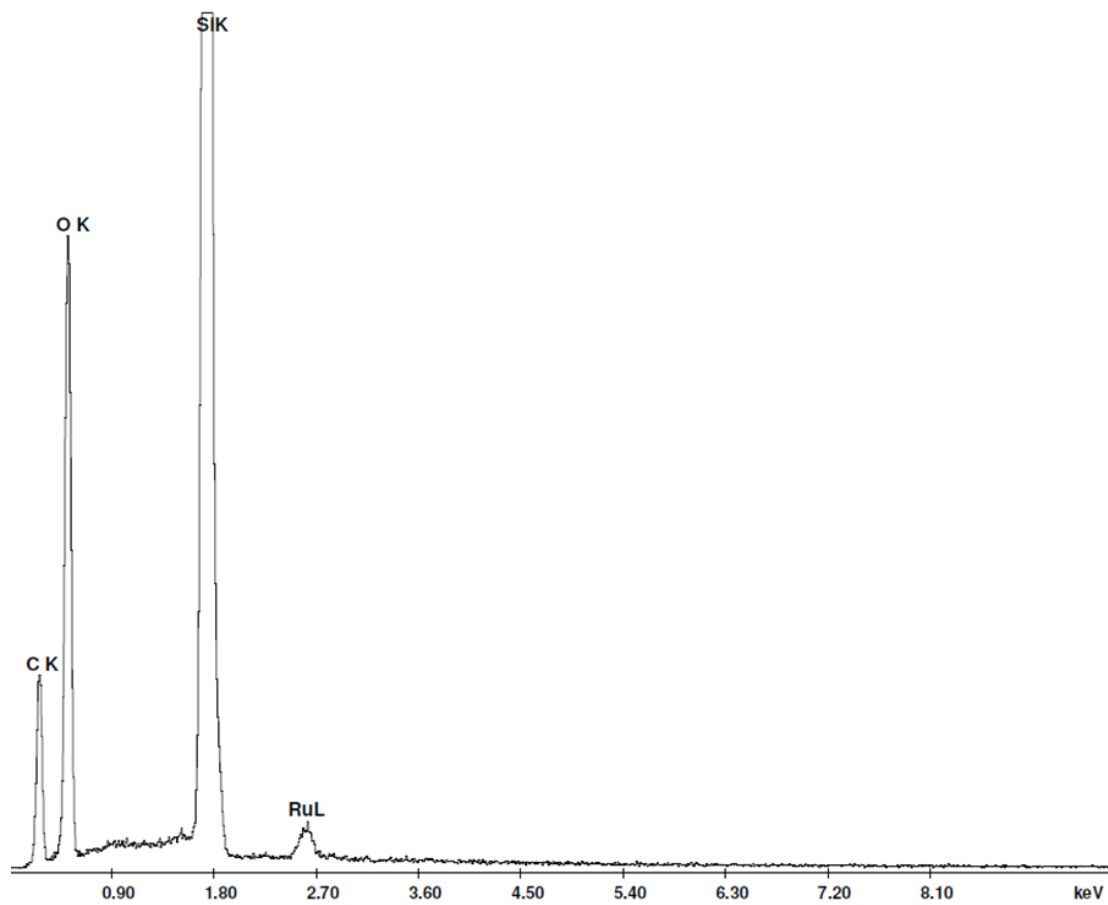

Figure S 21. EDX analysis of en-HG2@Peanut

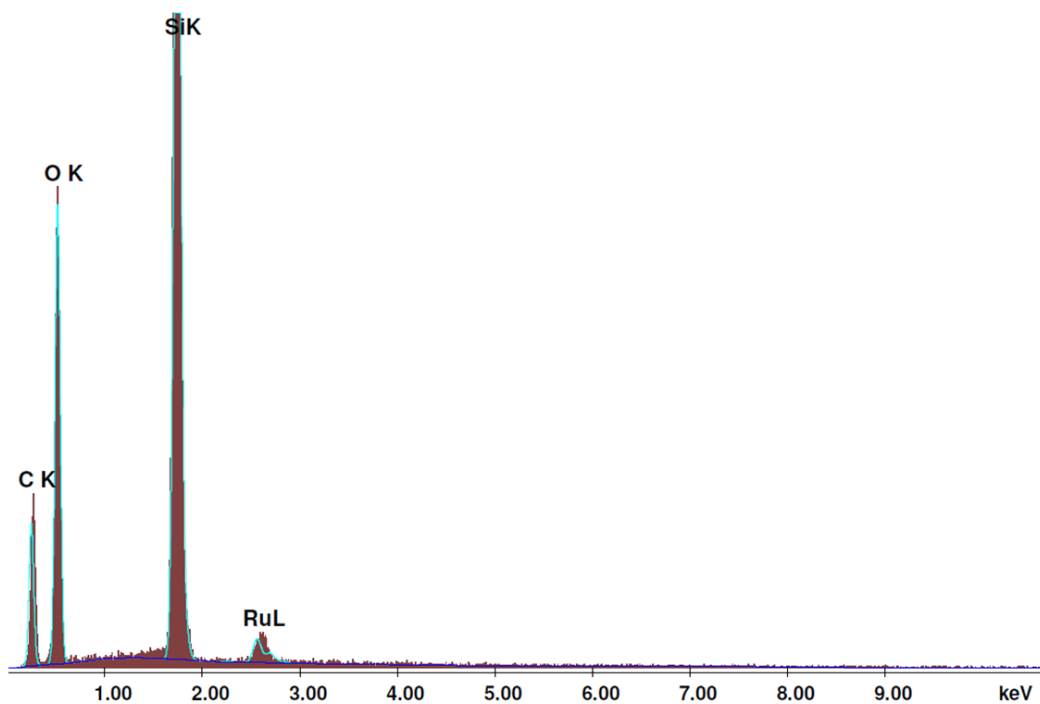

Figure S 22. EDX analysis of en-HG2@Capsule

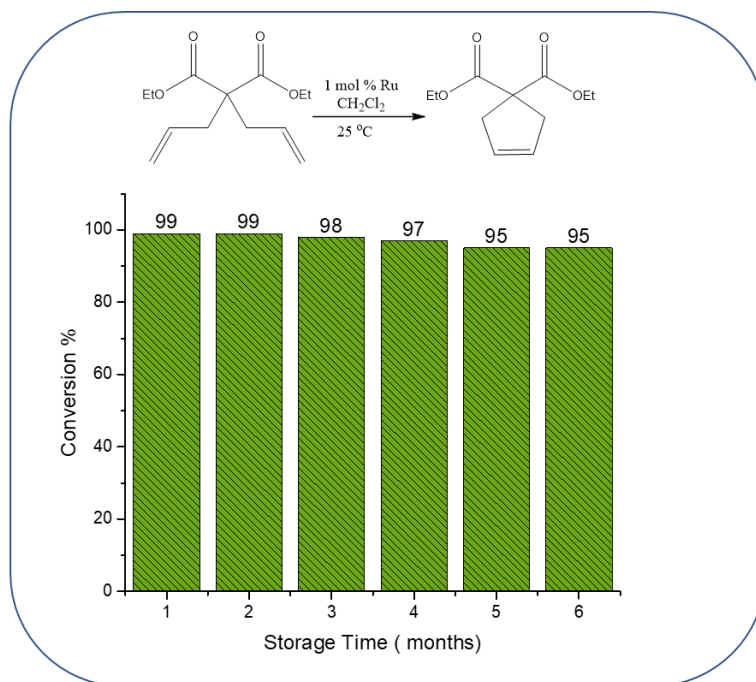

Figure S 23. Long-term storage performance of the catalyst (en-HG2@Peanut)

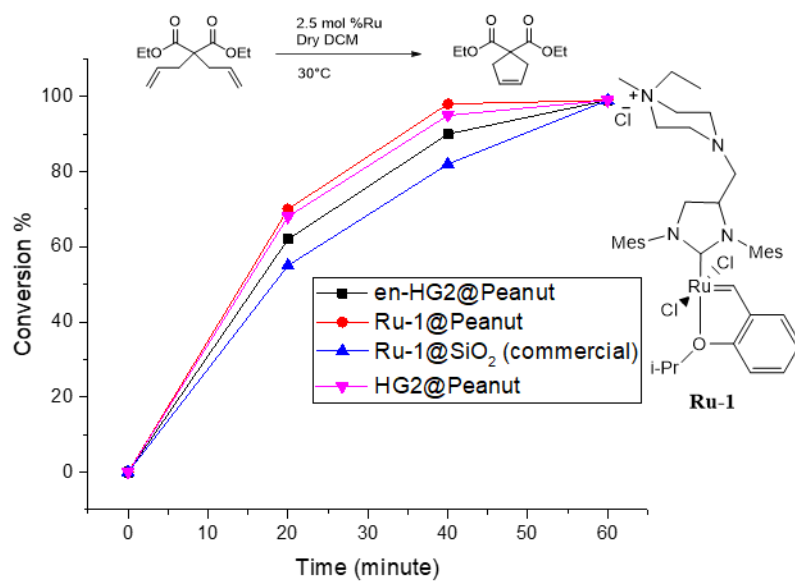

**Figure S24.** The comparison of RCM performances of Aquamet (Ru-1) and HG2 on peanut shaped silica gel.

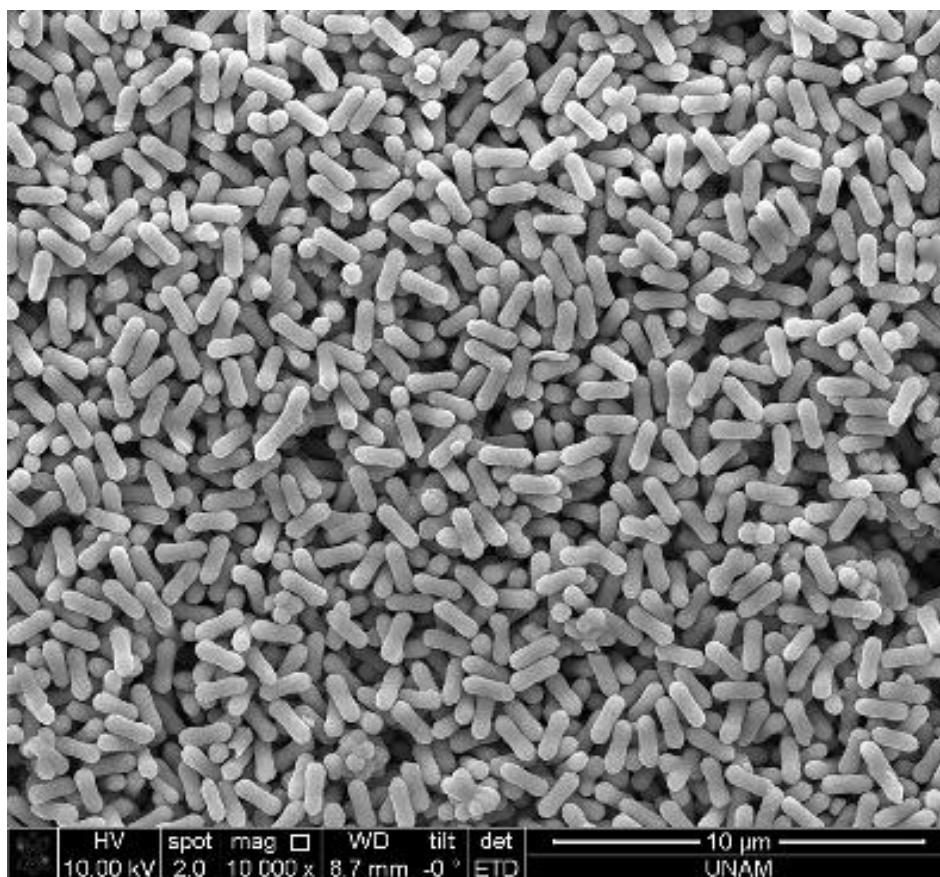

**Figure S25.** SEM images of peanut shaped hematite particles

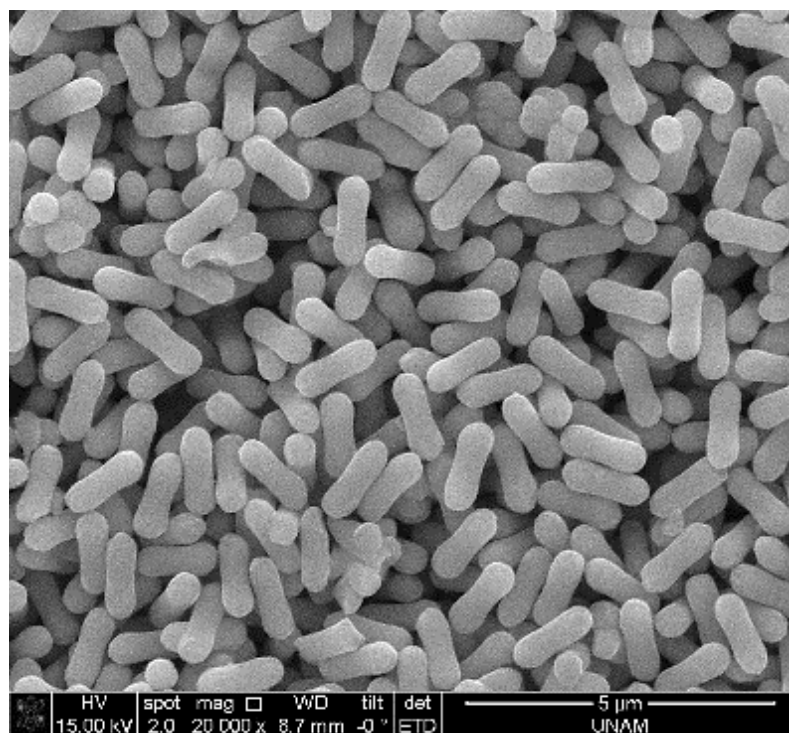

Figure S26. SEM images of peanut shaped  $\text{SiO}_2@Fe_2O_3$

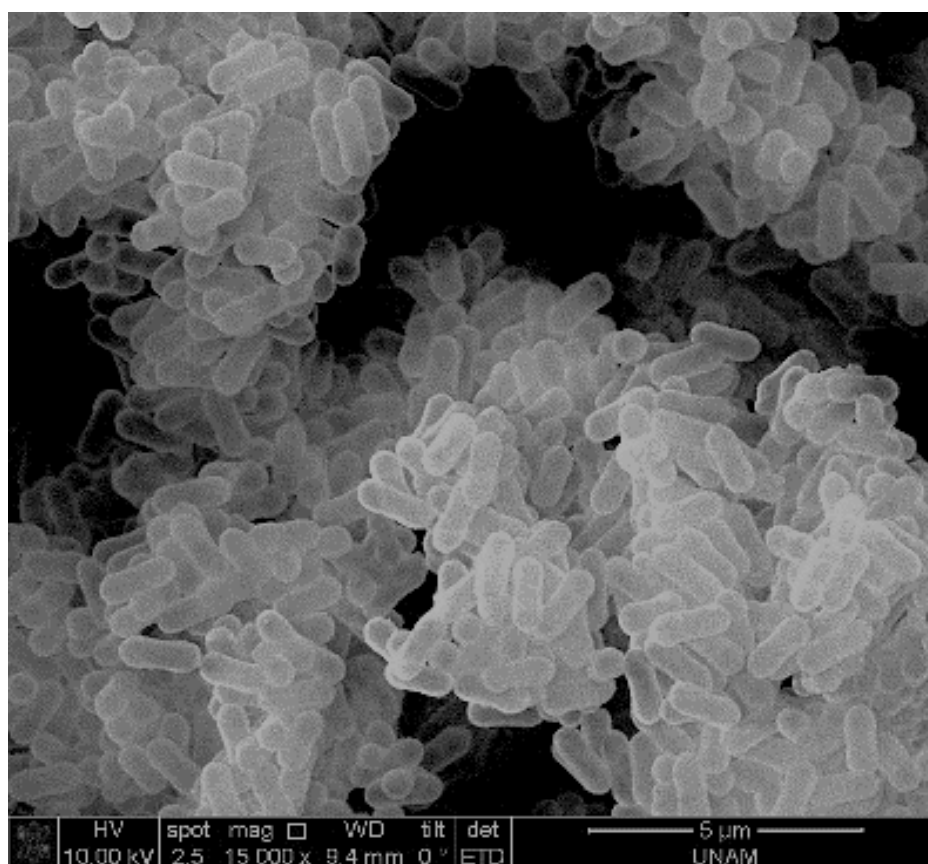

Figure S27. SEM images of peanut shaped hollow silica gels

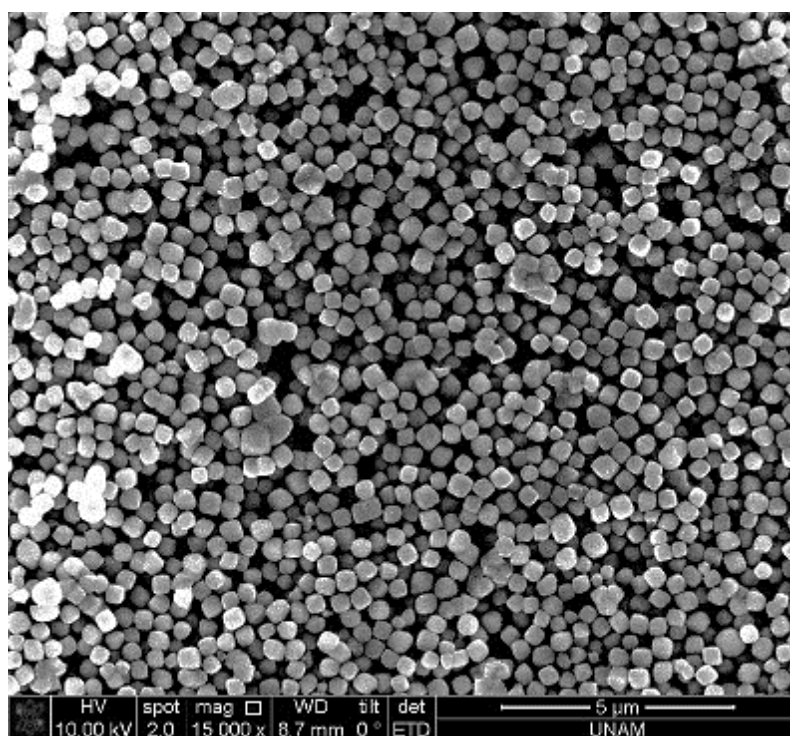

Figure S28. SEM images of square shaped hematite particles

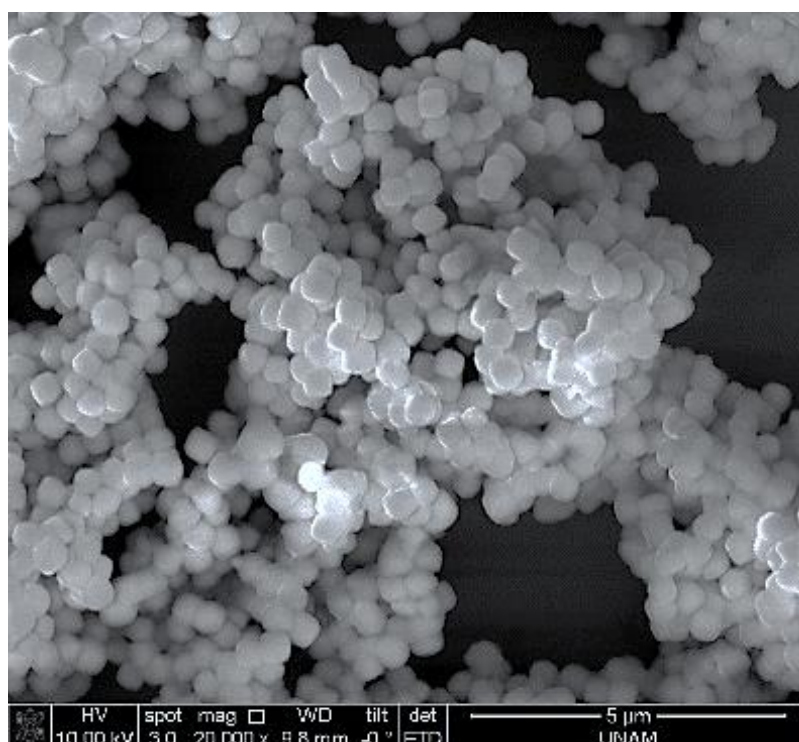

Figure S29. SEM images of square shaped SiO<sub>2</sub>@Fe<sub>2</sub>O<sub>3</sub>

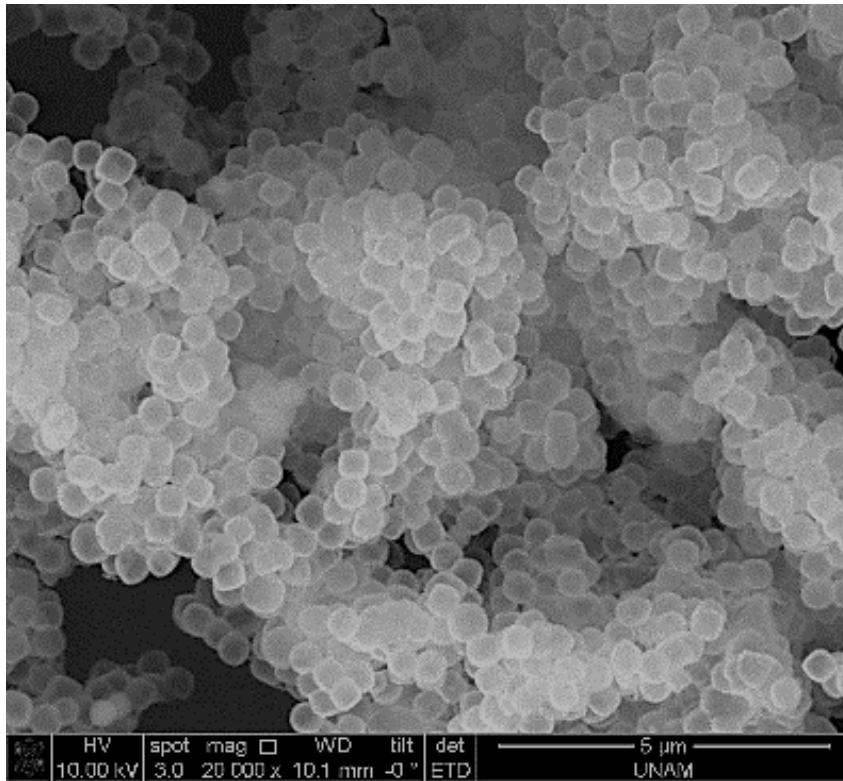

**Figure S30.** SEM images of square shaped hollow silica gels

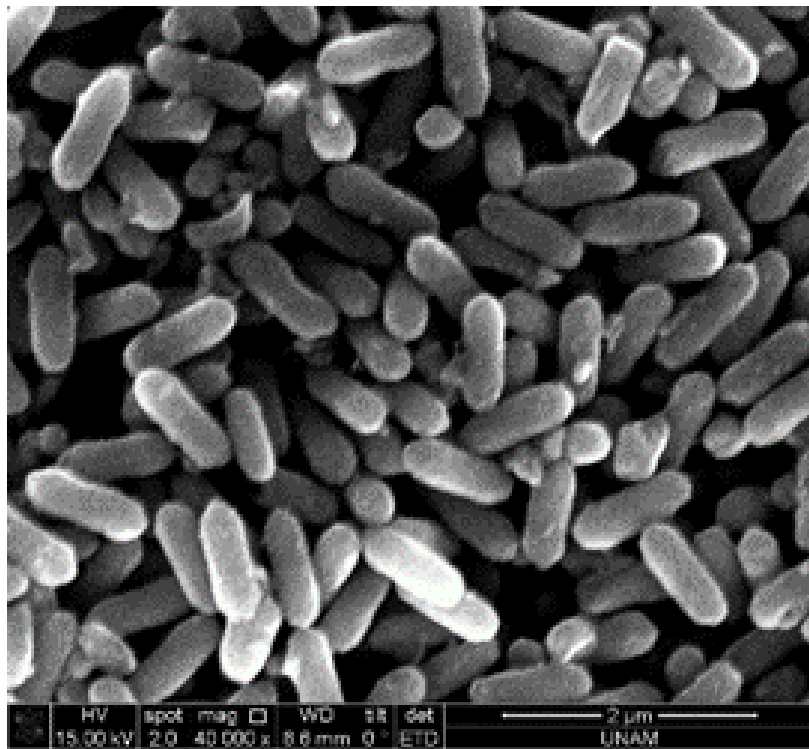

**Figure S31.** SEM images of capsule shaped hematite particles



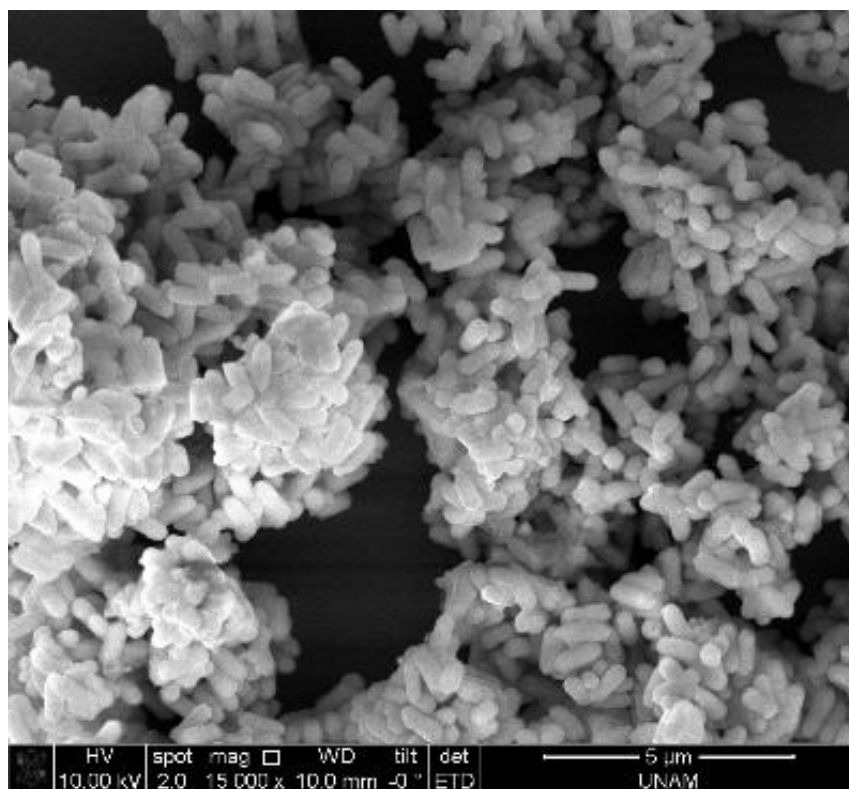

Figure S32. SEM images of capsule shaped  $\text{SiO}_2@Fe_2O_3$

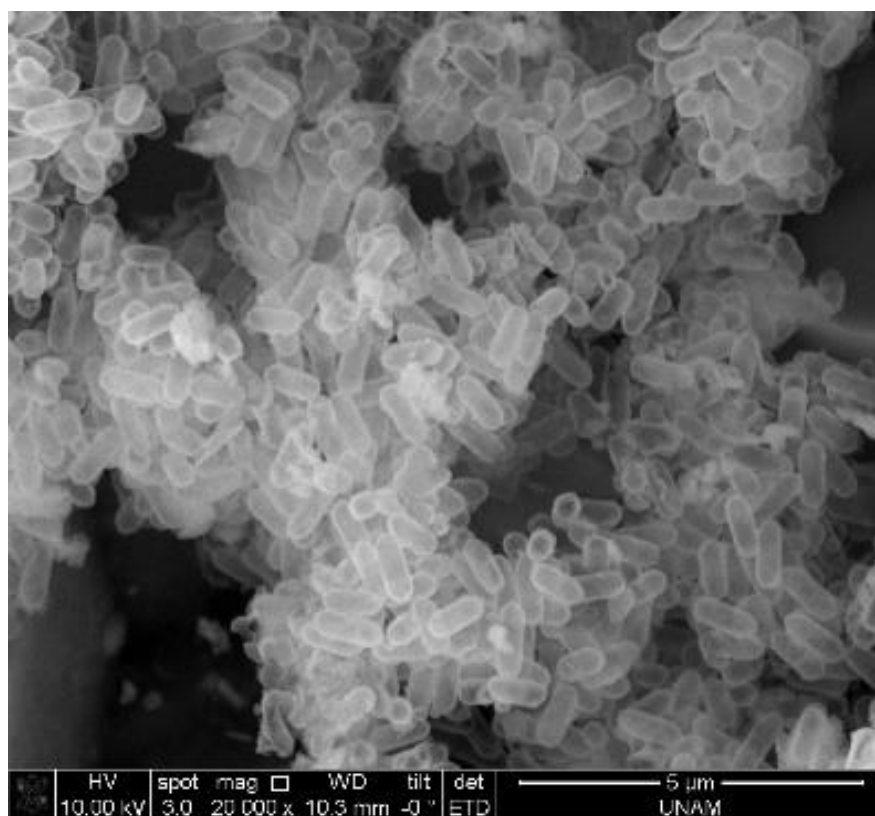

Figure S33. SEM images of capsule shaped hollow silica gels
